# Supplementary material
Source: ML conference proceedings conference paper supplement (https://proceedings.mlr.press/v80/ravuri18a.html)
Supplement: Supplementary file [file ravuri18a-supp.pdf]

---

# Supplementary Material for Learning Implicit Generative Models with the Method of Learned Moments

---

## A. Experimental Details

### A.1. Experimental Setup

As mentioned in the main text, unless otherwise noted, generators use the standard DCGAN architecture with  $4 \times 4$  kernels. The structure of the generator architectures for different datasets are described in Table 4.

The moment network for Color MNIST mirror the standard DCGAN discriminator architecture with one modification: after the last convolutional layer, we replace linear layer of size  $[4 \times 4 \times C, 1]$  with two linear layers of sizes  $[4 \times 4 \times C, \text{noise dimension}]$  and  $[\text{noise dimension}, 1]$ , respectively, to ensure that there are at least as many moment network parameters as generator parameters. Furthermore, the generator is trained only with moments from gradient features, as activation features did not improve sample quality. This allowed the use of the Hessian-vector products to more quickly train the generator. Non-linearities between all layers are leaky ReLUs with leaky parameter 0.2.

For CIFAR-10, CelebA, and the daisy portion of ImageNet, we found some improvement using a larger moment network. Again, the moment network mirrors the DCGAN discriminator architecture, but with two changes: prior to each stride-2 convolutional layer we insert a stride-1 layer, and we decrease the kernel size to  $3 \times 3$ . Non-linearities between all layers are leaky ReLUs with leaky parameter 0.2. None of the moment networks use batch normalization. For experiments that used gradient and hidden unit features, hidden units were scaled by a constant factor (known as activation weights in Table 10) since the hidden units had a larger dynamic range than gradient features.

Table 10 shows the hyperparameters used for all experiments with a few exceptions. One is the the stability of MoLM training, which increases the number of objectives from 250 to 400. The second is the comparison of gradient features, activations, and both gradient features and activations, as we vary the size of the moment networks and vary the Adam optimizer’s  $\beta$  parameter in that experiment. The last is the comparison with GAN alternatives on CIFAR-10, and the differences are described in the last paragraph of Appendix A.1.

For comparisons, we use two standard, but somewhat flawed metrics: Inception Score (IS), and Fréchet Inception Distance (FID). For IS, we use the standard protocol and calcu-

late scores using 10 batches of 5,000 images (for a total of 50,000) images. For FID, we report distances using 5,000 and 50,000 generated images for comparison with adversarial methods. For all CIFAR-10 experiments in the main text, we use ImageNet-trained networks, as this is the standard network for comparison. As noted by (Rosca et al., 2017; Barratt and Sharma, 2018), however, Inception Scores and Fréchet Inception Distances based on ImageNet-trained networks can lead to misleading results. Therefore, we also include Inception Scores on CIFAR-trained networks<sup>4</sup> in Table 8 for comparison with future work. N.B. we do not include FID results on CIFAR-trained networks, since FID for baseline and proposed methods are extremely low (less than 2.0). We surmise that this is the result of the embedding layer of the CIFAR-trained network being far lower-dimensional than that of the ImageNet-trained one.

On CelebA and CIFAR-10, we tried four GAN variants: GAN (Goodfellow et al., 2014) with and without a gradient penalty (Gulrajani et al., 2017), Wasserstein GAN with a gradient penalty (Gulrajani et al., 2017), and DRAGAN (Kodali et al., 2017) with nonsaturating loss. The same generator architecture was used for the GAN variants as MoLM. The results reported for DRAGAN, GAN-GP, and WGAN-GP were the best obtained in a hyperparameter sweep over discriminator learning rates in 0.0001, 0.0002, 0.0003 and generator learning rates in the same interval. Whenever applicable, the gradient penalty coefficient used was 10. The models were trained using the AdamOptimizer with  $\beta_1=0.5$  and  $\beta_2=0.9$ . DRAGAN, GAN, and GAN-GP performed one discriminator update per generator update, while WGAN-GP performed 5 discriminator updates for generator updates, for a total of 200,000 generator updates.

On CIFAR-10, we found that our GAN variants had Inception Scores up to 0.2 worse than comparable published results. For completeness, we include these results in Table 7. We did not believe the this would be a reliable indicator of relative performance between adversarial methods and the proposed one. For a more sound comparison, we use GAN-GP and WGAN-GP results from Miyato et al. (2018), as those results are the best we found. It uses a different convolutional generator architecture (its specification can be found in Table 12), which provides the extra benefit of showing that MoLM can train more than just DCGAN gen-

---

<sup>4</sup>This network can be found at [http://download.tensorflow.org/models/frozen\\_vgg\\_v1\\_2018\\_03\\_28.tar.gz](http://download.tensorflow.org/models/frozen_vgg_v1_2018_03_28.tar.gz).

|                                     | Color MNIST | CIFAR-10  | CelebA    | ImageNet Daisy |
|-------------------------------------|-------------|-----------|-----------|----------------|
| Noise dimension                     | 128         | 128       | 256       | 256            |
| Projection layer size               | 4×4×256     | 4×4×512   | 4×4×512   | 4×4×512        |
| Conv. transpose layer 1 output size | 8×8×128     | 8×8×256   | 8×8×256   | 8×8×256        |
| Conv. transpose layer 2 output size | 16×16×64    | 16×16×128 | 16×16×128 | 16×16×128      |
| Conv. transpose layer 3 output size | N/A         | N/A       | 32×32×64  | 32×32×64       |
| Conv. transpose layer 4 output size | N/A         | N/A       | N/A       | 64×64×32       |
| Output layer size                   | 32×32×3     | 32×32×3   | 64×64×3   | 128×128×3      |
| Output nonlinearity                 | sigmoid     | tanh      | tanh      | tanh           |
| Hidden nonlinearity                 | ReLU        | ReLU      | ReLU      | ReLU           |
| Kernel size                         | 5×5         | 4×4       | 4×4       | 4×4            |
| Batch norm                          | Yes         | Yes       | Yes       | Yes            |
| Number of parameters                | 1,557,571   | 3,685,123 | 4,861,827 | 4,893,123      |

Table 4. Generator architectures across different datasets.

|                         | MoLM-512    | MoLM-768    | MoLM-1024     | MoLM-1536     |
|-------------------------|-------------|-------------|---------------|---------------|
| Size-Preserving Layer 1 | 3×3×3×128   | 3×3×3×192   | 3×3×3×256     | 3×3×3×384     |
| Stride-2 Layer 1        | 3×3×128×128 | 3×3×192×192 | 3×3×256×256   | 3×3×384×384   |
| Size-Preserving Layer 2 | 3×3×128×256 | 3×3×192×384 | 3×3×256×512   | 3×3×384×768   |
| Stride-2 Layer 2        | 3×3×256×256 | 3×3×384×384 | 3×3×512×512   | 3×3×768×768   |
| Size-Preserving Layer 3 | 3×3×256×512 | 3×3×384×768 | 3×3×512×1024  | 3×3×768×1536  |
| Stride-2 Layer 3        | 3×3×512×512 | 3×3×768×768 | 3×3×1024×1024 | 3×3×1536×1536 |
| Linear Layer            | 8,192×1     | 12,288×1    | 16,384×1      | 24,576×1      |
| Batch norm              | No          | No          | No            | No            |
| Hidden nonlinearity     | LReLU       | LReLU       | LReLU         | LReLU         |
| Number of Activations   | 285,600     | 420,864     | 560,128       | 838,656       |
| Number of Parameters    | 4,584,577   | 10,305,217  | 18,311,425    | 41,180,545    |
| Number of Total Moments | 4,866,177   | 10,726,081  | 18,871,553    | 42,019,201    |

Table 5. Moment Network Architectures for CIFAR-10

erators. We also believe that those results are among the best for GAN-GP and WGAN-GP for any generator architecture. We also compare to the spectrally-normalized GANs (SN-GAN) in that work. For the DCGAN generator, we compare against MMD-GAN and MMD-RBF as those can be considered moment-based methods. Results were taken from Li et al. (2017). Finally, we include published results for Coulomb GAN (Unterthiner et al., 2017).

## A.2. Large Generator Training on CelebA

The experiments in the main text only train generators with up to 5 million parameters. To show the method can scale to a larger number of generator parameters, we doubled the number of channels and increased the kernel size to 5×5. The number of parameters is now 20 million, and Table 11 details the architecture. The moment network mirrors a DCGAN discriminator with 1,024 channels, and adds an extra linear layer to ensure the number of moments is greater than the number of generator parameters. No hidden unit features were used in order to speed up training using the Hessian-vector product trick. Figure 6 shows the result of the experiment: while the generator surprisingly learns some

structure of faces using random moments, the generator learns a higher-quality sampler of faces with MoLM.

## B. Consistency and Asymptotic Normality of Moment Estimators

In this section, we review the consistency and asymptotic normality conditions for moment estimators. Many of these conditions are now standard within a body of work in econometrics known as “Generalized Method of Moments.”

### B.1. Consistency and Asymptotic Normality Conditions Squared Error Objective

The consistency and asymptotic normality conditions for the Equation 1 (reproduced below) are taken from (Hall, 2005).

$$\mathcal{L}^G(\theta) = m_N(x_{1,\dots,N}, \theta)^\top W_N m_N(x_{1,\dots,N}, \theta)$$

We remove the dependence on  $\Phi$  because it is static. Note that below:

$$m(x, \theta) := m_1(x_1, \theta) = \Phi(x) - \mathbb{E}_{p(z)}[\Phi(g_\theta(z))]$$

|                         | CelebA                             | ImageNet Daisy                     |
|-------------------------|------------------------------------|------------------------------------|
| Size-Preserving Layer 1 | $3 \times 3 \times 3 \times 96$    | $3 \times 3 \times 3 \times 48$    |
| Stride-2 Layer 1        | $3 \times 3 \times 96 \times 96$   | $3 \times 3 \times 48 \times 48$   |
| Size-Preserving Layer 2 | $3 \times 3 \times 96 \times 192$  | $3 \times 3 \times 48 \times 96$   |
| Stride-2 Layer 2        | $3 \times 3 \times 192 \times 192$ | $3 \times 3 \times 96 \times 96$   |
| Size-Preserving Layer 3 | $3 \times 3 \times 192 \times 384$ | $3 \times 3 \times 96 \times 192$  |
| Stride-2 Layer 1        | $3 \times 3 \times 384 \times 384$ | $3 \times 3 \times 192 \times 192$ |
| Size-Preserving Layer 4 | $3 \times 3 \times 384 \times 768$ | $3 \times 3 \times 192 \times 384$ |
| Stride-2 Layer 2        | $3 \times 3 \times 768 \times 768$ | $3 \times 3 \times 384 \times 384$ |
| Size-Preserving Layer 5 | N/A                                | $3 \times 3 \times 384 \times 768$ |
| Stride-2 Layer 5        | N/A                                | $3 \times 3 \times 768 \times 768$ |
| Linear Layer            | $12,288 \times 1$                  | $12,288 \times 1$                  |
| Batch norm              | No                                 | No                                 |
| Hidden nonlinearity     | LReLU                              | LReLU                              |
| Number of Activations   | 921,600                            | 1,941,504                          |
| Number of Parameters    | 10,551,649                         | 10,612,657                         |
| Number of Total Moments | 11,473,249                         | 12,554,161                         |

Table 6. Moment Network Architectures for CelebA and ImageNet Daisy

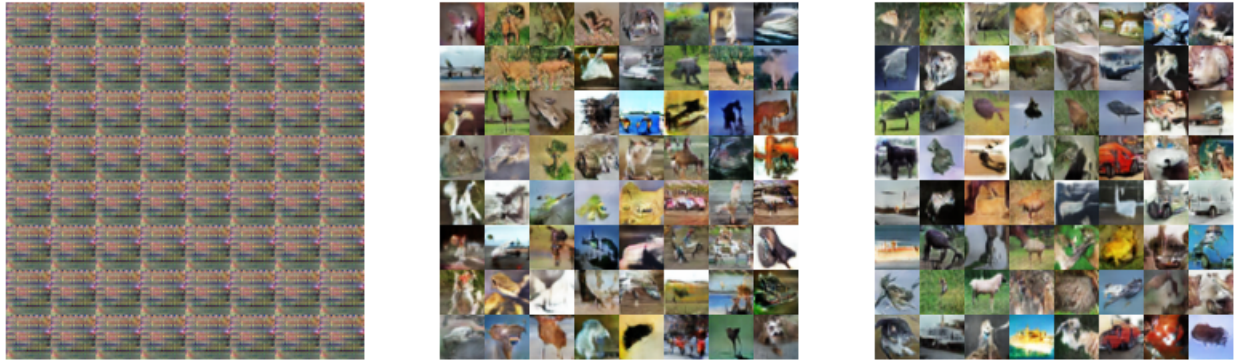

Figure 5. Samples for only activation features, gradient features, and gradient+activation features. Architecture and hyperparameters are using the default generator and MoLM-1024 moment network.

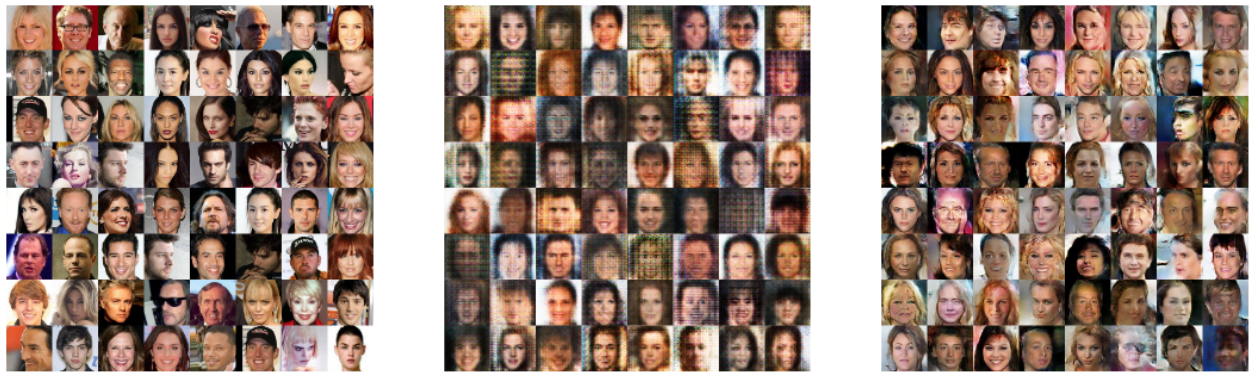

Figure 6. CelebA samples for large generator training. From left to right: 1) data, 2) examples from the generator trained with random moment network weights, 3) examples from the generator trained with MoLM.

Consistency conditions are:

- The  $(d \times 1)$  random vectors  $\{x_i; i = 1, \dots\}$  form a strictly stationary process with sample space  $\mathbf{X} \subset \mathbb{R}^d$ .
- The function  $m : \mathbf{X} \times \Theta \rightarrow \mathbb{R}^k$ , where  $k < \infty$ , satisfies: (i) it is continuous on  $\Theta$  for each  $x_i \in \mathbf{X}$ ; (ii)  $\mathbb{E}_{p(x)}[m(x, \theta)]$  exists and is finite for every  $\theta \in \Theta$ ; (iii)

Table 7. Inception Score for baseline methods and MoLM on CIFAR-10.

| Method          | Inception Score |
|-----------------|-----------------|
| GAN             | 6.75            |
| GAN-GP          | 6.88            |
| DRAGAN          | 6.89            |
| WGAN-GP         | 6.48            |
| <b>MoLM-768</b> | <b>7.56</b>     |

Table 8. Inception Scores using a CIFAR-trained network for MoLM variants.

| Architecture | Method           | Inception Score |
|--------------|------------------|-----------------|
| DCGAN        | GAN-GP           | 6.41            |
| DCGAN        | WGAN-GP          | 6.34            |
| DCGAN        | DRAGAN           | 6.35            |
| <b>DCGAN</b> | <b>MoLM-768</b>  | <b>6.55</b>     |
| <b>Conv.</b> | <b>MoLM-1024</b> | <b>6.87</b>     |
| <b>Conv.</b> | <b>MoLM-1536</b> | <b>7.13</b>     |

$\mathbb{E}_{p(x)}[m(x, \theta)]$  is continuous on  $\Theta$ .

- The random vector  $X$  and the parameter vector  $\theta^*$  satisfy the population moment condition:  $\mathbb{E}_{p(x)}[m(x, \theta^*)] = 0$  and  $\mathbb{E}_{p(x)}[m(x, \hat{\theta})] \neq 0 \quad \forall \hat{\theta} \neq \theta^*$ .
- $W_N$  is a PSD matrix which converges in probability to the PD matrix of constants  $W$ .
- The random process  $\{X_i, -\infty < i < \infty\}$  is ergodic.
- $\Theta$  is a compact set.
- $\mathbb{E}_{p(x)}[\sup_{\theta \in \Theta} \|m(X, \theta)\|] < \infty$

The third condition is known as global identifiability, and is typically difficult to verify. A heuristic that seems to work well in practice is to assume that the number of moments is greater than the number of model parameters, and that the Jacobian of moments with respect to the model parameters is full-rank.

If in addition the following conditions are true:

- (I) (i) The derivative matrix  $\nabla_{\theta} m(x_i, \theta)$  exists and is continuous on  $\Theta$  for each  $x_i \in X$ ; (ii)  $\theta^*$  is an interior point of  $\Theta$ ; (iii)  $\mathbb{E}_{p(x)}[\nabla_{\theta} m(x, \theta^*)]$  exists and is finite.

- (II)  $\mathbb{E}_{p(x)}[m(x, \theta)m(x, \theta)^{\top}]$  exists and is finite, and  $\lim_{T \rightarrow \infty} \text{cov}(T^{1/2} \sum_{i=1}^N \frac{m(x_i, \theta^*)}{N}) = \Sigma$  exists and is a finite valued positive definite matrix.

- (III)  $\mathbb{E}_{p(x)}[\nabla_{\theta} m(x, \theta)]$  is continuous on some neighborhood  $\mathcal{N}_{\epsilon}$  of  $\theta^*$ .

- (IV)  $\sup_{\theta \in \mathcal{N}_{\epsilon}} \rho \xrightarrow{P} 0$  as  $T \rightarrow \infty$ .

$$\rho = \text{tr}(\|\frac{1}{T} \sum_{i=1}^T \nabla_{\theta} m(x_i, \theta) - \mathbb{E}_{p(x)}[\nabla_{\theta} m(x, \theta)]\|^2)^{1/2}$$

Then the estimator is asymptotically normal with variance given in Theorem 2.

## B.2. Consistency and Asymptotic Normality Conditions for Simulated Method of Moments

Duffie and Singleton (1993) proved consistency and asymptotic normality for the more general case of Markov generators. In the i.i.d. scenario, some of the conditions are trivial. We modify the conditions for the i.i.d. case, but please refer to the original paper for more general conditions.

Consistency conditions are:

- For each  $\theta \in \Theta$ ,  $\{\|\Phi(g_{\theta}(z_i))\|_{2+\delta}, i = 1, 2, \dots\}$  is bounded for some  $\delta > 0$ . The family  $\{\Phi(g_{\theta}(z_i))\}$  is Lipschitz, uniformly in probability.
- $\Sigma$  is nonsingular.
- Define  $\mathcal{L}^G(\theta) = \hat{m}_N(x_{1,\dots,N}, \Phi, \theta)^{\top} \hat{m}_N(x_{1,\dots,N}, \Phi, \theta)$ . Then  $\mathcal{L}^G(\theta^*) < \mathcal{L}^G(\theta)$  for all  $\theta \neq \theta^*$ .

Asymptotic normality additionally requires:

- (i)  $\theta^*$  and estimators  $\{\hat{\theta}_N\}$  are interior to  $\Theta$ . (ii)  $\Phi(g_{\theta}(z_i))$  is continuously differentiable with respect to  $\theta$  for all  $i$ . (iii)  $\mathbb{E}_{p(z)}[\nabla_{\theta} \Phi(g_{\theta^*}(z))]$  exists, is finite, and has full rank.
- The family  $\{\nabla_{\theta} \Phi(g_{\theta}(z_i)), \theta \in \Theta, i = 1, 2, \dots\}$  is Lipschitz, uniformly in probability. For all  $\theta \in \Theta$ ,  $\mathbb{E}_{p(z)}[\|\nabla_{\theta} \Phi(g_{\theta}(z))\|] < \infty$ , and  $\theta \mapsto \mathbb{E}_{p(z)}[\nabla_{\theta} \Phi(g_{\theta}(z))]$  is continuous.

If the conditions are true, then the asymptotic variance is the one outlined in Theorem 3.

## B.3. Moment Matching with Alternative Distances

Adversarial training seems to be performing moment matching with access to a single moment per generator step. Can we say anything how this changes the asymptotics? Presently, no, but we can say something about the asymptotics of matching a finite number of moments with respect to another metric (in this case  $\|l\|_{\infty}$ ), instead of squared error:

**Theorem 4.** *Under the Assumptions below, the estimator  $\hat{\theta}_N$  converges in probability to  $\theta^*$ . Furthermore, we have:*

$$\sqrt{N}(\hat{\theta}_N - \theta^*) \rightarrow \arg \min_{\zeta} d(Y + G\zeta)$$

where  $Y \sim \mathcal{N}(0, \Sigma)$  and  $G := \mathbb{E}_{p(z)}[\nabla_{\theta} \Phi(g_{\theta^*}(z))]$

This result is proved in (Han and De Jong, 2004). Asymptotic normality requires conditions on the distance function  $\delta(\cdot)$ , conditions on the notion of a localized distance, and moment conditions. The conditions on the distance function are:

- $\delta(\cdot)$  is continuous

**Learning Implicit Generative Models with the Method of Learned Moments**

|                                           | Color MNIST | CIFAR-10  | CelebA    | ImageNet Daisy |
|-------------------------------------------|-------------|-----------|-----------|----------------|
| Number of objectives $N_o$                | 150         | 250       | 250       | 250            |
| Number of moment training steps $N_m$     | 100         | 100       | 100       | 100            |
| Number of generating training steps $N_g$ | 2,000       | 2,000     | 2,000     | 2,000          |
| Learning rate $\alpha$                    | 1E-4        | 1E-4      | 1E-4      | 1E-4           |
| Adam $\beta_1/\beta_2$                    | 0.9/0.999   | 0.9/0.999 | 0.9/0.999 | 0.9/0.999      |
| Activation weights                        | 0.0         | 1E-4      | 1E-4      | 1E-4           |
| Norm penalty parameter $\lambda$          | 0.1         | 1.0       | 1.0       | 1.0            |
| Batch size                                | 1000        | 200       | 200       | 200            |

Table 9. Hyperparameters for different datasets for all experiments except those comparing to adversarial methods.

|                                           | DCGAN     | Conv      |
|-------------------------------------------|-----------|-----------|
| Number of objectives $N_o$                | 700       | 800       |
| Number of moment training steps $N_m$     | 50        | 50        |
| Number of generating training steps $N_g$ | 1,000     | 1,000     |
| Learning rate $\alpha$                    | 1E-4      | 1E-4      |
| Adam $\beta_1/\beta_2$                    | 0.9/0.999 | 0.9/0.999 |
| Activation weights                        | 1E-3      | 1E-3      |
| Norm penalty parameter $\lambda$          | 0.1       | 0.1       |
| Generator batch size                      | 200       | 200       |
| Moment batch size                         | 50        | 50        |

Table 10. Hyperparameters for different architectures for GAN comparison on CIFAR-10.

|                                     | CIFAR-10                  |
|-------------------------------------|---------------------------|
| Noise dimension                     | 128                       |
| Projection layer size               | $4 \times 4 \times 512$   |
| Conv. transpose layer 1 output size | $8 \times 8 \times 256$   |
| Conv. transpose layer 2 output size | $16 \times 16 \times 128$ |
| Conv. transpose layer 3 output size | $32 \times 32 \times 64$  |
| Stride-1 Conv. layer output size    | $32 \times 32 \times 3$   |
| Output nonlinearity                 | tanh                      |
| Conv. transpose layer kernel size   | $4 \times 4$              |
| Stride-1 Conv. layer kernel size    | $3 \times 3$              |
| Batch norm                          | Yes                       |
| Number of parameters                | 3,811,907                 |

- $\delta(x) = 0$  iff  $x = 0$
- $\delta(x) = \delta(-x)$
- $\delta$  satisfies the triangle inequality up to a finite constant locally (in a neighborhood of 0), i.e., there exists an  $\epsilon > 0$  such that if  $\|x_1\|_1 < \epsilon$  and  $\|x_2\|_1 < \epsilon$  then  $\delta(x_1 + x_2) \leq M[\delta(x_1) + \delta(x_2)] \quad \forall x_1, x_2$ , for some  $M < \infty$ .

The authors define a sequence of *localized distance* functions as

$$d_n(x) = \frac{\delta(n^{-1/2}x)}{\delta(n^{-1/2}1)} \quad n = 1, 2, \dots$$

Table 12. Generator architecture for GAN comparison on CIFAR-10.

|                                     | CelebA                    |
|-------------------------------------|---------------------------|
| Noise dimension                     | 256                       |
| Projection layer size               | $4 \times 4 \times 1024$  |
| Conv. transpose layer 1 output size | $8 \times 8 \times 512$   |
| Conv. transpose layer 2 output size | $16 \times 16 \times 256$ |
| Conv. transpose layer 3 output size | $32 \times 32 \times 128$ |
| Output layer size                   | $64 \times 64 \times 3$   |
| Output nonlinearity                 | tanh                      |
| Kernel size                         | $5 \times 5$              |
| Batch norm                          | Yes                       |
| Number of parameters                | 20,615,427                |

Conditions on the localized distance are:

- There is a real function  $\phi(\cdot)$  on  $\mathbb{R}^q$  such that  $\inf_n d_n(x) \geq \phi(x)$ , and  $\phi(x) \rightarrow \infty$  if  $|x| \rightarrow \infty$ .
- $d_n$  converges uniformly in every compact subset of  $\mathbb{R}^q$  to a continuous function  $d$ .
- $d(z + Bt)$  achieves its minimum at a unique point of  $t \in \mathbb{R}^p$  for each  $z \in \mathbb{R}^q$  and for any  $q \times p$  matrix  $B$  with full column rank.

Table 11. Generator architecture for large generator parameter experiment.

Conditions on the moments (again removing dependence on  $\Phi$ ) are:

- $\Theta$  is a compact set.
- $\hat{m}_N(x_1, \dots, x_N, \theta) = \frac{1}{N} \sum_{i=1}^N m(x_i, \theta)$  converges in probability to a nonrandom function  $\mu(\theta)$  uniformly on  $\Theta$ .
- $\mu(\theta) = 0$  iff  $\theta = \theta^*$  where  $\theta^*$  is an interior point of  $\Theta$ .
- $\hat{G}_N(\theta) = \frac{1}{N} \sum_{i=1}^N \nabla_{\theta} m(x_i, \theta)$  exists and converges in probability to a nonrandom function  $G(\theta)$  uniformly in a neighborhood of  $\theta^*$  and  $G(\theta^*)$  has full column rank.
- There exists  $\hat{\theta}$  in between  $\theta$  and  $\theta^*$  such that

$$\hat{m}_N(x_1, \dots, x_N, \theta) = \hat{m}_N(x_1, \dots, x_N, \theta^*) + \hat{G}_N(\theta)(\theta - \theta^*)$$

for  $\theta$  in a neighborhood of  $\theta^*$ .

- $\sqrt{N} \hat{m}_N(x_1, \dots, x_N, \theta) \xrightarrow{d} \mathcal{N}(0, \Sigma)$

## C. Proofs

### C.1. Proof of Proposition 1

The proof of the following statement is sufficiently simple that there is likely an earlier proof. Unfortunately, we could not find a reference, so we are likely re-proving this statement.

**Proposition.** *Suppose the kernel function  $K(x, y) = K(x - y)$  is real, shift-invariant, Bochner integrable, and without loss of generality  $K(0)=1$ . Then:*

$$\begin{aligned} & \mathbb{E}_{p(x, x')} [K(x, x')] - 2\mathbb{E}_{p(x, y)} [K(x, y)] + \mathbb{E}_{p(y, y')} [K(y, y')] \\ &= \mathbb{E}_{p(\omega)} [(\mathbb{E}_{p(x)} [\cos(\omega^\top x)] - \mathbb{E}_{p(y)} [\cos(\omega^\top y)])^2] \\ & \quad + \mathbb{E}_{p(\omega)} [(\mathbb{E}_{p(x)} [\sin(\omega^\top x)] - \mathbb{E}_{p(y)} [\sin(\omega^\top y)])^2] \end{aligned}$$

where  $p(\omega)$  is a probability measure specified by the kernel.

*Proof.* From Bochner's Theorem for real kernels (Zhao and Meng, 2015):

$$K(x - y) = \mathbb{E}_{p(\omega)} [K(0) \cos(\omega^\top (x - y))]$$

When  $K(0) = 1$ ,  $p(\omega)$  is a probability measure. Without loss of generality let  $K(0) = 1$ . Since the kernel is integrable we can interchange expectations.

$$\begin{aligned} \mathbb{E}[K(x, y)] &= \mathbb{E}_{p(x, y)} [\mathbb{E}_{p(\omega)} [\cos(\omega^\top (x - y))]] \\ &= \mathbb{E}_{p(\omega)} [\mathbb{E}_{p(x, y)} [\cos(\omega^\top (x - y))]] \end{aligned}$$

Then:

$$\begin{aligned} \mathbb{E}_{p(x, y)} [\cos(\omega^\top (x - y))] &= \mathbb{E}_{p(x, y)} [\cos(\omega^\top x) \cos(\omega^\top y)] \\ & \quad + \mathbb{E}_{p(x, y)} [\sin(\omega^\top x) \sin(\omega^\top y)] \\ &= \mathbb{E}_{p(x)} [\cos(\omega^\top x)] \mathbb{E}_{p(y)} [\cos(\omega^\top y)] \\ & \quad + \mathbb{E}_{p(x)} [\sin(\omega^\top x)] \mathbb{E}_{p(y)} [\sin(\omega^\top y)] \end{aligned}$$

Addition of  $\mathbb{E}_{p(x, x')} [K(x, x')] - 2\mathbb{E}_{p(x, y)} [K(x, y)] + \mathbb{E}_{p(y, y')} [K(y, y')]$  yields the result.  $\square$

### C.2. Simplification of Coulomb GAN

We offer a simpler interpretation of optimality of the generator in Coulomb GAN (Unterthiner et al., 2017) using ideas from Maximum Mean Discrepancy. Suppose we are learning an implicit generative model using MMD:

$$\mathcal{L}(\theta) = \min_{\theta} \sup_{f \in \mathcal{F}} \mathbb{E}_{p(x)} [f(x)] - \mathbb{E}_{p(z)} [f(g_{\theta}(z))]$$

If we knew  $f^*$ , the function that maximizes the inner supremum, then we can simplify the loss to:

$$\mathcal{L}(\theta) = \min_{\theta} -\mathbb{E}_{p(z)} [f^*(g_{\theta}(z))] \quad (3)$$

If the function class  $\mathcal{F}$  is the unit ball in a Reproducing Kernel Hilbert Space, then the witness function  $f^*$ , defined in Gretton et al. (2012), can be analytically calculated as:

$$f^*(t) \propto \mathbb{E}_{p(x)} [k(x, t)] - \mathbb{E}_{p(z)} [k(g_{\theta}(z), t)]$$

The empirical version of which is:

$$\hat{f}^*(t) \propto \frac{1}{m} \sum_i k(x_i, t) - \frac{1}{n} \sum_j k(g_{\theta}(z_j), t)$$

Plugging in this scaled witness function into the Monte Carlo estimate of Equation 3 gives us a biased estimate of the loss.  $\mathcal{L}(\theta)$  is a distance if the kernel  $k(x, y)$  is characteristic.

In Coulomb GAN (Unterthiner et al., 2017), the discriminator and generator steps are:

$$\begin{aligned} \mathcal{L}_D(D; G) &= \frac{1}{2} \mathbb{E}_{p(t)} \left( (D(t) - \hat{\Phi}(t))^2 \right) \\ \mathcal{L}_G(D; G) &= -\frac{1}{2} \mathbb{E}_{p(z)} (D(g_{\theta}(z))) \end{aligned}$$

The authors define the empirical estimate of the potential function  $\Phi$  (not to be confused with feature functions in the main text) as:

$$\hat{\Phi}(t) = \frac{1}{m} \sum_i k(x_i, t) - \frac{1}{n} \sum_j k(g_{\theta}(z_j), t)$$

and

$$\begin{aligned} p(t) &= \frac{1}{2} \int \mathcal{N}(t; g_{\theta}(z), \epsilon I) p_z(z) dz \\ & \quad + \frac{1}{2} \int \mathcal{N}(t; x, \epsilon I) p_x(x) dx \end{aligned}$$

$\hat{\Phi}$  is merely the empirical estimate of the witness function, discriminator  $D$  is a model of the empirical witness function,

and the generator loss is that of Equation 3. The empirical estimate of  $\mathcal{L}_G(D; G)$  is biased, though it's unknown how this affects training in practice. Note that dependence of  $\theta$  on  $f^*$  requires frequent retraining of  $D$ .

To demonstrate that the loss is a distance, it remains to show that the function class  $\mathcal{F}$  is rich enough, or equivalently that the kernel function  $k(x, y)$  is characteristic. Note that the proposed Plummer kernel:

$$k_p(a, b) = \frac{1}{(\sqrt{\|a - b\|^2 + \epsilon^2})^d}$$

is a rational quadratic kernel:

$$k_{rq}(a, b) = \sigma^2 \left( 1 + \frac{\|a - b\|^2}{2\alpha l^2} \right)^{-\alpha}$$

with  $\alpha = \frac{d}{2}$ ,  $\sigma = \epsilon^{-d/2}$  and  $l = \frac{\epsilon}{\sqrt{d}}$ . Since rational quadratic kernels are characteristic, so are Plummer kernels.
